# Supplementary material for: Semantic priming and schizotypal personality: reassessing the link between thought disorder and enhanced spreading of semantic activation
Source: PeerJ journal article supplement (doi:10.7717/peerj.9511), 2020-07-30
Supplement: supplemental-article-S1.pdf [file supplemental-article-S1.pdf]

1 **Semantic priming and schizotypal personality:**  
2 **reassessing the link between thought disorder and**  
3 **enhanced spreading of semantic activation**

4

5 Javier Rodríguez-Ferreiro<sup>1,2</sup>, Mari Aguilera<sup>1</sup>, Robert Davies<sup>3</sup>

6 <sup>1</sup> Grup de Recerca en Cognició i Llenguatge, Departament de Cognició, Desenvolupament i

7 Psicologia de l'Educació, Universitat de Barcelona, Barcelona, Spain

8 <sup>2</sup> Institut de Neurociències, Universitat de Barcelona, Barcelona, Spain

9 <sup>3</sup> University of Lancaster, United Kingdom

10

11 Corresponding Author:

12 Javier Rodríguez-Ferreiro

13 Campus Mundet, psg de la Vall d'Hebron, 171, Barcelona, 08035, Spain

14 Email address: [rodriguezferreiro@ub.edu](mailto:rodriguezferreiro@ub.edu)

15

16 **Abstract**

17 The term schizotypy refers to a group of stable personality traits with attributes similar to  
18 symptoms of schizophrenia, usually classified in terms of positive, negative or cognitive  
19 disorganization symptoms. The observation of increased spreading of semantic activation in  
20 individuals with schizotypal traits has led to the hypothesis that thought disorder, one of the  
21 characteristics of cognitive disorganization, stems from semantic disturbances. Nevertheless, it is  
22 still not clear under which specific circumstances (i.e., automatic or controlled processing, direct  
23 or indirect semantic relation) schizotypy affects semantic priming or whether it does affect it at  
24 all. We conducted two semantic priming studies with volunteers varying in schizotypy, one with  
25 directly related prime-target pairs and another with indirectly related pairs. Our participants  
26 completed a lexical decision task with related and unrelated pairs presented at short (250 ms) and  
27 long (750 ms) stimulus onset asynchronies (SOAs). Then, they responded to the brief versions of  
28 the Schizotypal Personality Questionnaire and the Oxford-Liverpool Inventory of Feelings and  
29 Experiences, both of which include measures of cognitive disorganization. Bayesian mixed-  
30 effects models indicated expected effects of SOA and semantic relatedness, as well as an  
31 interaction between relatedness and directness (greater priming effects for directly related pairs).  
32 Even though our analyses demonstrated good sensitivity, we observed no influence of cognitive  
33 disorganization over semantic priming. Our study provides no compelling evidence that  
34 schizotypal symptoms, specifically those associated with the cognitive disorganization  
35 dimension, are rooted in an increased spreading of semantic activation in priming tasks.

36

## 37 **Explanation of analysis approach**

38 The use of mixed-effects models to estimate potential effects on lexical decision response  
39 latencies is warranted by the design of the study. Because we recorded multiple observations for  
40 each participant and each stimulus, and because all participants were presented with the same  
41 stimuli, we cannot assume that observed responses were independent (Baayen, Davidson, &  
42 Bates, 2008). This ruled out the use of linear models (ANOVA or regression analyses) which  
43 assume observations are independent. Moreover, because response data can be grouped by  
44 sampled participant or by sampled stimulus (prime or target), we must take into account the ways  
45 in which response latencies may have varied according to random differences between  
46 participants or between stimuli in average reaction time (random intercepts), when controlling  
47 for experimental effects, as well as the ways in which the impact of experimental factors may  
48 have varied according to random differences (random slopes) between participants or between  
49 stimuli. Taking these random effects into account in an analysis has been demonstrated to ensure  
50 more accurate estimation of the effects of interest, here, the effects of priming or SOA conditions  
51 (McElreath, 2018). In all analyses, models were fitted with maximal random effects structures  
52 (Barr, Levy, Scheepers, & Tily, 2013; Matuschek, Kliegl, Vasishth, Baayen, & Bates, 2017),  
53 corresponding to critical interaction effects (see the explanation following), to control for the risk  
54 of false positive (Type I) or negative (Type II) errors.

55  
56 In our analyses, we used the *brms* library (Bayesian regression models using ‘Stan’; Bürkner,  
57 2017, 2019; Carpenter et al., 2017) to fit Bayesian mixed-effects models. This is, in part, because  
58 Bayesian models have been found to converge essentially irrespective of model complexity  
59 whereas frequentist models may sometimes fail to converge (Eager & Roy, 2017; Matuschek et  
60 al., 2017) in situations where random effects structures are complex relative to available data.  
61 Bayesian models virtually always converge to accurate values of the parameters and produce  
62 accurate values of credible intervals for any sample (Liddell & Kruschke, 2018). It is also, in  
63 part, because Bayesian methods permit flexibility, not readily afforded under alternative  
64 approaches, to assume realistic models for the data generating processes hypothesized to underlie  
65 the production of observed responses (Martin & Williams, 2017; Nicenboim & Vasishth, 2016).  
66 In the current study, we were able to assume that response latencies were compatible with an ex-  
67 Gaussian likelihood function. The ex-Gaussian has been shown to furnish an accurate

68 representation of the skewed distribution typical of reaction time data (Matzke & Wagenmakers,  
69 2009; van Zandt, 2000). As will be seen, posterior predictive checks demonstrated that this  
70 assumption enabled us to fit models that effectively captured the distribution of the reaction  
71 times observed in our study.

72

73 In general, Bayesian models are scientifically advantageous because they yield accurate  
74 representations of the posterior distribution (see e.g., Nicenboim & Vasishth, 2016; Vasishth et  
75 al., 2018, for tutorial introductions). For each parameter (including each fixed and random  
76 effect), we assumed that coefficient estimates may vary in sign and magnitude. Bayesian models  
77 yield a posterior probability distribution representing the differing probabilities of each potential  
78 value of an effect, given the observed evidence and prior expectations about likely effects. This  
79 means that, for each effect, we are able to report the most probable value of the estimate for the  
80 effect, while the spread of the posterior distribution directly indicates our uncertainty about the  
81 effect estimate. We report credible intervals (CrI) to summarize that uncertainty. In line with  
82 intuition, credibility intervals indicate the range within which we can suppose with a certain  
83 probability that the “true value” of a parameter lies given the data and the model.

84

85 The specification of model parameters reflected the features of our study design and the  
86 attributes of data collection in the sub-studies. We explain, in the following, how design or data  
87 collection features mapped to model specification choices. In particular, critical to the  
88 specification of random effects structures, we outline how experimental variables were  
89 manipulated or varied with respect to sample grouping variables (i.e., within- or between-  
90 participants or stimuli). We checked how our assumptions might potentially modulate the effects  
91 estimates in sensitivity analyses presented in supplementary materials (see Supplemental Article  
92 S2).

93

94 We recorded the latency of responses to word or pseudoword target stimuli in a lexical decision  
95 task. Each target was presented following a word prime stimulus, and our analysis focused on the  
96 latency of responses to word targets; we excluded responses to pseudowords. In each trial, the  
97 response interval lasted for 2000ms from target stimulus offset so that we only recorded lexical  
98 decisions if response onset had been less than 2000ms. We excluded observations corresponding

99 to latencies faster than 300ms, non-responses within the 2000ms interval, and target  
100 classification errors. Given the skew typical of response latencies in word recognition tasks, we  
101 assumed *a priori* that response latencies would be adequately described by an Ex-Gaussian  
102 function (see the discussion following), and that response latencies would be distributed in the  
103 range 300-2000ms (we checked the impact of varying this assumption, Supplemental Article S2).

104

105 The study design required the manipulation of prime-target relatedness, the directness of the  
106 prime-target relation, and prime-target stimulus onset asynchrony, in addition to the observation  
107 of participants' scores on the SPQ-B and sO-LIFE measures of variation in schizotypy  
108 dimensions. We manipulated the directness of the relation between prime and target in two  
109 separate sub-studies. As different groups of participants were recruited to different sub-studies,  
110 this means that the directness of prime-target relatedness was manipulated between-participants.  
111 The first and second sub-studies were identical in the composition of the prime stimulus set but  
112 differed in the target stimulus set so that directness was manipulated within-primers but between-  
113 targets. All participants saw each prime and target under both SOA and both relatedness so that  
114 SOA and relatedness were manipulated within-participants, within-primers and within-targets.

115

116 We fitted models that took into account the features of study design and data collection just  
117 outlined. We sum-coded the effects of the categorical variables: prime-target relatedness; SOA;  
118 and directness of prime-target relatedness. We standardized participants' scores on the  
119 schizotypy dimensions. We fitted separate models including the effects of participant variation  
120 on each dimension of one set of schizotypy scales (sO-LIFE or SPQ-B) only. Models were  
121 structured to estimate effects of these variables as well as the effects of all interactions up to and  
122 including the potential four-way interaction between the effects of directness, schizotypy  
123 dimension, SOA and relatedness. We can express this as:

124

125  $RT \sim \text{directness} \times \text{schizotypy dimensions} \times \text{SOA} \times \text{relatedness}$

126

127 where the four-way interaction stands for all effects of each variable as well as all lower-order  
128 two-way interactions (including, e.g., interactions between directness and relatedness, or  
129 between schizotypal disorganization and relatedness) and all three-way interactions (including

130 interactions between SOA, disorganization and relatedness). While the distinction between fixed  
131 and random effects is inconsistent (Gelman & Hill, 2007), and arguably does not have force in  
132 Bayesian analyses (Nicenboim & Vasishth, 2016), we continue to use it because of its wide  
133 adoption in presentations of mixed-effects models in the literature (Meteyard & Davies, 2020).  
134 In these terms, we fitted models that included parameters corresponding to random effects  
135 associated with:

136 (1.) unexplained differences between sampled participants in intercepts (random intercepts) and  
137 in the within-participant effects of SOA, relatedness and the SOA x relatedness interaction  
138 (random slopes); as well as correlations between random intercepts and random slopes;  
139 (2.) unexplained differences between sampled primes or targets in intercepts (random intercepts)  
140 and in the within-stimulus effects of participants' variation in schizotypy dimensions, and in the  
141 effects of SOA, relatedness and the SOA x relatedness interaction (random slopes); as well as  
142 differences in the within-prime effect of directedness; along with correlations between random  
143 intercepts and random slopes.

144  
145 Bayesian models require the specification of prior probability distributions, in addition to the  
146 likelihood, and the fixed and random effects structure. In the present article, we report the  
147 posterior distributions of parameter estimates yielded by models assuming *weakly informative*  
148 priors for fixed effects coefficients or random effects variances: Gaussian (normal) probability  
149 distributions centered on a mean of zero with a standard deviation of 10 ( $\beta \sim$   
150  $Normal(0, 10); SD \sim Normal(0, 10)$ ). This assumption of priors expresses the belief that the  
151 parameter values would lie between  $-20$  and  $+20$  with 95% probability. This range results from  
152 the fact that 95% of the probability in a Normal distribution lies within the interval  $\mu \pm 2\sigma$  (see,  
153 e.g., Vasishth et al., 2018, for a discussion). However, we acknowledge that other researchers  
154 would regard alternate prior distributions as more appropriate. Therefore, we fitted a series of  
155 models with the same fixed and random effects structures but varying prior probability  
156 distributions. We report our observations on the variation in parameter estimates, in association  
157 with variation in priors, in the supplementary report on sensitivity analyses (Supplemental  
158 Article S2). In all models, we assumed the LKJ(2) prior for the correlations between random  
159 effects because it assumes that extreme values (i.e., approaching  $r \pm 1$ ) are implausible  
160 (Vasishth et al., 2018). We also assumed that because the response interval was limited to

161 2000ms and, based on our experience of observing word recognition latencies, it was reasonable  
162 to suppose a prior of  $\beta_0 \sim Normal(1000, 500)$  for intercepts, that is, supposing that the  
163 intercept would lie between 0-2000ms (i.e.,  $\mu \pm 2\sigma$ ) with 95% probability. (Our sensitivity  
164 analyses examined, also, the impact of this choice compared to at least one alternate,  
165 Supplemental Article S2.)

166

167 We report the estimates derived from the fitted models in the main manuscript. We describe,  
168 here, however, the distribution of observed response latencies (Supplemental Fig. S3) because  
169 the form of the distribution relates to the reasonableness of our assumption of an ex-Gaussian  
170 likelihood function in modeling the lexical decisions recorded in our sub-studies. Fig. S3 shows  
171 that the distributions of observed RTs for each sub-study have similar forms, with peaks between  
172 500-700ms, with variation in the shorter RTs appearing to conform to a Gaussian (normal)  
173 distribution, and longer RTs presenting a marked skew appearing to conform to an exponential  
174 modification of the Gaussian. The observed RT distribution is typical for a word recognition task  
175 and it is congruent with the assumption, implemented in our models, that reaction times are  
176 generated by a process that can be described by defining an ex-Gaussian likelihood function. Our  
177 intention, in choosing the ex-Gaussian, was simply to arrive at a good description of observed  
178 latencies but alternate likelihood functions are available, including those that correspond to the  
179 lognormal (e.g. Nicenboim & Vasishth, 2016), shifted lognormal (Vasishth et al., 2018), or skew  
180 normal (Martin & Williams, 2017). We share our data and analysis code to enable readers to  
181 examine the impact on parameter estimates of varying the likelihood function; we report our own  
182 examination of this question in the sensitivity analyses.

183

184 The full dataset and code for the analyses are available at OSF: <https://osf.io/j29fn/>.

185

186

187 **References**

- 188 Baayen, R. H., Davidson, D. J., & Bates, D. M. (2008). Mixed-effects modeling with crossed  
189 random effects for subjects and items. *Journal of Memory and Language*, *59*, 390–412.
- 190 Barr, D. J., Levy, R., Scheepers, C., & Tily, H. J. (2013). Random effects structure for  
191 confirmatory hypothesis testing : Keep it maximal. *Journal of Memory and Language*,  
192 *68*, 255–278. <https://doi.org/10.1016/j.jml.2012.11.001>
- 193 Bürkner, P. (2017). brms: An R Package for Bayesian Multilevel Models Using Stan. *Journal of*  
194 *Statistical Software*, *80*, 1–28.
- 195 Bürkner, P. (2019). *brms: Bayesian Regression Models using “Stan.”* Retrieved from  
196 <https://cran.r-project.org/web/packages/brms/brms.pdf>
- 197 Carpenter, B., Gelman, A., Hoffman, M., Lee, D., Goodrich, B., Betancourt, M., ... Ridell, A.  
198 (2017). Stan: A Probabilistic Programming Language. *Journal of Statistical Software*, *76*,  
199 1–32.
- 200 Eager, C., & Roy, J. (2017). Mixed effects models are sometimes terrible. *ArXiv Preprint*  
201 *ArXiv:1701.04858*.
- 202 Gelman, A., & Hill, J. (2007). *Data analysis using regression and hierarchical/multilevel*  
203 *models*. New York, NY: Cambridge University Press.
- 204 Liddell, T. M., & Kruschke, J. K. (2018). Analyzing ordinal data with metric models: What  
205 could possibly go wrong? *Journal of Experimental Social Psychology*, *79*, 328–348.
- 206 Martin, S. R., & Williams, D. R. (2017). Outgrowing the Procrustean Bed of Normality: The  
207 Utility of Bayesian Modeling for Asymmetrical Data Analysis. *PsyArXiv*.
- 208 Matuschek, H., Kliegl, R., Vasishth, S., Baayen, H., & Bates, D. (2017). Balancing Type I error  
209 and power in linear mixed models. *Journal of Memory and Language*, *94*, 305–315.
- 210 Matzke, D., & Wagenmakers, E. J. (2009). Psychological interpretation of the ex-Gaussian and  
211 shifted Wald parameters: A diffusion model analysis. *Psychonomic Bulletin & Review*,  
212 *16*, 798-817.
- 213 McElreath, R. (2018). *Statistical rethinking: A bayesian course with examples in R and Stan*.  
214 Chapman & Hall/CRC Press.
- 215 Meteyard, L., & Davies, R. A. (2020). Best practice guidance for linear mixed-effects models in  
216 psychological science. *Journal of Memory and Language*, *112*, 104092.
- 217 Nicenboim, B., & Vasishth, S. (2016). Statistical methods for linguistic research: Foundational  
218 Ideas—Part II. *Language and Linguistics Compass*, *10*, 591-613.
- 219 Van Zandt, T. (2000). How to fit a response time distribution. *Psychonomic Bulletin & Review*,  
220 *7*, 424-465.



221 Vasishth, S., Nicenboim, B., Beckman, M. E., Li, F., & Kong, E. J. (2018). Bayesian data  
222 analysis in the phonetic sciences: A tutorial introduction. *Journal of Phonetics*, 71, 147-  
223 161.
