# Supplementary material for: Semantic priming and schizotypal personality: reassessing the link between thought disorder and enhanced spreading of semantic activation
Source: PeerJ journal article supplement (doi:10.7717/peerj.9511), 2020-07-30
Supplement: supplemental-article-S2.pdf [file supplemental-article-S2.pdf]

1 **Semantic priming and schizotypal personality:**  
2 **reassessing the link between thought disorder and**  
3 **enhanced spreading of semantic activation**

4  
5 Javier Rodríguez-Ferreiro<sup>1,2</sup>, Mari Aguilera<sup>1</sup>, Robert Davies<sup>3</sup>

6 <sup>1</sup> Grup de Recerca en Cognició i Llenguatge, Departament de Cognició, Desenvolupament i  
7 Psicologia de l'Educació, Universitat de Barcelona, Barcelona, Spain

8 <sup>2</sup> Institut de Neurociències, Universitat de Barcelona, Barcelona, Spain

9 <sup>3</sup> University of Lancaster, United Kingdom

10

11 Corresponding Author:

12 Javier Rodríguez-Ferreiro

13 Campus Mundet, psg de la Vall d'Hebron, 171, Barcelona, 08035, Spain

14 Email address: [rodriguezferreiro@ub.edu](mailto:rodriguezferreiro@ub.edu)

15

16 **Abstract**

17 The term schizotypy refers to a group of stable personality traits with attributes similar to  
18 symptoms of schizophrenia, usually classified in terms of positive, negative or cognitive  
19 disorganization symptoms. The observation of increased spreading of semantic activation in  
20 individuals with schizotypal traits has led to the hypothesis that thought disorder, one of the  
21 characteristics of cognitive disorganization, stems from semantic disturbances. Nevertheless, it is  
22 still not clear under which specific circumstances (i.e., automatic or controlled processing, direct  
23 or indirect semantic relation) schizotypy affects semantic priming or whether it does affect it at  
24 all. We conducted two semantic priming studies with volunteers varying in schizotypy, one with  
25 directly related prime-target pairs and another with indirectly related pairs. Our participants  
26 completed a lexical decision task with related and unrelated pairs presented at short (250 ms) and  
27 long (750 ms) stimulus onset asynchronies (SOAs). Then, they responded to the brief versions of  
28 the Schizotypal Personality Questionnaire and the Oxford-Liverpool Inventory of Feelings and  
29 Experiences, both of which include measures of cognitive disorganization. Bayesian mixed-  
30 effects models indicated expected effects of SOA and semantic relatedness, as well as an  
31 interaction between relatedness and directness (greater priming effects for directly related pairs).  
32 Even though our analyses demonstrated good sensitivity, we observed no influence of cognitive  
33 disorganization over semantic priming. Our study provides no compelling evidence that  
34 schizotypal symptoms, specifically those associated with the cognitive disorganization  
35 dimension, are rooted in an increased spreading of semantic activation in priming tasks.

36

## 37 **Sensitivity analyses**

38 Our models were specified according to a number of assumptions. We motivated our  
39 assumptions by reasoning that proceeded from the implications of the study design, and the  
40 features of the data collection method, to develop a statistical account of the cognitive processes  
41 that could generate the responses recorded in the lexical decision task. Our reasoning is  
42 explained in the main article but we acknowledge that other researchers might make different  
43 decisions about the most appropriate analysis than those we adopted, in addressing the same  
44 research questions (Goodman, Fanelli, & Ioannidis, 2016) or, indeed, in examining the same data  
45 (cf. Silberzahn et al., 2018). We share our data and analysis code to facilitate *methods*  
46 *reproducibility* (Goodman et al., 2016), enabling other researchers to reproduce the results we  
47 present in our report. In sharing our data and code, in addition, we seek to enable other  
48 researchers to address the same questions, with the same data, supposing different analytic  
49 choices. This is because we think reasonable people may differ, on decisions pertaining to an  
50 analysis, in response to the study design or data collection method we have described (as  
51 demonstrated e.g., by Silberzahn et al., 2018), and we embrace this potential diversity as a means  
52 to establish the generalizability of empirical findings. We follow Gelman and Hennig (2016),  
53 therefore, by seeking to account for our assumptions or decisions in the main article and, here, by  
54 conducting an analysis of the stability of estimates given potential variation in approach. For our  
55 purposes (of course, other researchers may differ even in this), our sensitivity analyses were done  
56 to examine how effects estimates might vary given different decisions about the likelihood  
57 function, or about the Bayesian priors (see, also, Depaoli and van de Schoot, 2017). (We offer  
58 readers one caveat: one reason why we did not base our results on frequentist models of the data,  
59 using, for example, the *lme4* library (Bates et al., 2019) is that we found that models with similar  
60 random effects specifications did not converge; see Supplemental Article S3.)

61

### 62 *Likelihood functions and posterior predictive checks*

63 If a model is a good fit then we should be able to use it to generate data similar to the data we  
64 observed (Gabry, 2017; Gabry, Simpson, Vehtari, Betancourt, & Gelman, 2019). To generate the  
65 data used for such posterior predictive checks (PPC), we simulate them from the posterior  
66 predictive distribution. This is the distribution of the outcome variable implied by a model after  
67 using the observed data to update our beliefs about unknown model parameters.

68

69 We explained that the reaction time distributions for tasks like lexical decision are typically  
70 observed to be skewed towards longer latencies (see Supplemental Article S1) and this form has  
71 been argued to be well described as an ex-Gaussian distribution (e.g., Matzke & Wagenmakers,  
72 2009; van Zandt, 2000). (The density plots depicting the distribution of observed reaction times  
73 in our study can be seen in Supplemental Fig. S3.) We opted, therefore, to assume an ex-  
74 Gaussian likelihood function at the core of the Bayesian models fitted to the data in our study.  
75 Assuming an ex-Gaussian likelihood meant that we did not have to suppose that observed  
76 latencies had a normal distribution despite the skew clearly indicated in Figure S3 but *we could*  
77 *have* assumed a Gaussian likelihood. A comparison of the PPC plots in Figure S4 shows that, in  
78 fact, with models that assumed an ex-Gaussian likelihood (plots in left and center panels), there  
79 was an excellent fit for the observed latencies. Figure S4 presents overlaid density plots, showing  
80 for each model the distribution of observed latencies (dark blue, labelled “y”) overlaid with  
81 outcomes simulated from the posterior predictive distribution (light blue, labelled “y\_rep”),  
82 given the model.

83

84 [Figure S4 about here]

85 *Figure S4. Posterior predictive check plots for key model variants*

86

87 It is in striking contrast that, if one were to assume a Gaussian likelihood function, while the  
88 MCMC-sampling was efficient and the parameter estimates were similar to those we report, the  
89 posterior predictive check showed a marked discrepancy between the distribution of model  
90 predicted response latencies and the distributed of observed latencies (Figure S4, right-most  
91 panel).

92

93 *Variation in priors and variation in estimates*

94 In analyzing the study data, we were aware that there would be reasonable latitude about the  
95 assumption of prior probability distributions for model parameters. We opted to assume  
96 regularizing or weakly informative priors (see Nicenboim & Vasishth, 2016, for discussion)  
97 expressing the assumption that parameter estimates (e.g., the coefficients of effects) would be  
98 found to occur, with potential variation in value, according to a probability distribution identified

99 as a Gaussian, broadly spread, probability distribution centered on zero. We assumed this  
100 because effects of variables like SOA or relatedness could conceivably be positive or negative  
101 but were unlikely to take extreme values. Beyond these assumptions, we supposed that  
102 reasonable people might differ on the most appropriate prior probability distributions for model  
103 parameters, including fixed effects coefficients or random effects variances. Therefore, we  
104 evaluated what impact our choice versus alternate choices of priors would have on the posterior  
105 distributions of parameters, conducting an analysis thereby to examine the sensitivity of  
106 estimates to the choice of priors (e.g., Depaoli & van de Schoot, 2017; Vasishth et al., 2018), in  
107 other words, to examine the stability of estimates (Gelman & Hennig, 2016).

108

109 In the main article, we report the posterior distributions of parameters found with models  
110 assuming priors for fixed effects or random effects variances centered on a mean of zero with a  
111 standard deviation of 10 ( $\beta \sim Normal(0,10)$ ;  $SD \sim Normal(0,10)$ ), expressing the belief that  
112 the parameter values would lie between  $-20$  and  $+20$  with 95% probability. However, it is  
113 possible that other researchers would regard prior distributions of  $\beta \sim Normal(0,1)$ ;  $SD \sim$   
114  $Normal(0,1)$  or  $\beta \sim Normal(0,100)$ ;  $SD \sim Normal(0,100)$  as more appropriate. Therefore,  
115 we fitted a series of models with the same fixed and random effects structures but varying prior  
116 probability distributions. In half of the model variants, we fitted models assuming a prior  
117 probability distribution for intercepts of  $\beta_0 \sim Normal(0,1000)$ . However, we understood that  
118 this prior distribution would allow, unrealistically, for intercepts of negative RT. We also  
119 understood that because the response interval was limited to 2000ms it was more reasonable,  
120 perhaps, to suppose a prior of  $\beta_0 \sim Normal(1000,500)$ .

121

122 We plot the variation in estimates (the posterior distribution mean) of the effects of SOA,  
123 relatedness, directness and the directness by relatedness interaction (Figure S5). The plots  
124 indicate how parameter estimates vary with alternate choices of likelihood function (Gaussian  
125 vs. ex-Gaussian), intercept prior ( $\beta_0 \sim Normal(0,1000)$  vs.  $\beta_0 \sim Normal(1000,500)$ ), and  
126 fixed effects or random effects variance priors (SDs of 1, 10, or 100). Figure S5 presents a  
127 separate grid of plots for each effect: relatedness, directness, directness x relatedness, and SOA.  
128 In each grid, we present (on separate rows) plots showing effects estimates (coefficient values)  
129 for SPQ-B versus sO-LIFE models, and (in separate columns) plots showing effects estimates

130 from models assuming ex-Gaussian versus Gaussian likelihood functions. In each plot, we  
131 present point estimates (points correspond to the mean of the posterior) along with credible  
132 intervals (95% lower vs. upper bounds) for effects given variation (on the x-axis) of priors  
133 ( $N(0,1)$ ,  $N(0,10)$ ,  $N(0,100)$ , where N stands for *Normal*). In each plot, also, we show the  
134 estimates that derive from models assuming different priors on intercepts, either  $\beta_0 \sim$   
135 *Normal*(0,1000) or  $\beta_0 \sim$  *Normal*(1000,500).

136

137 Figure S5 shows that, for the effects about which we can have reasonably high certainty (the  
138 effects of SOA, relatedness, and the directness x relatedness interaction), variation in the spread  
139 (SD) of the prior probability distributions ( $N(0,1)$  vs.  $N(0,10)$  vs.  $N(0,100)$ ) is associated with  
140 limited variation in the magnitude of effects but no variation in the direction of effects. In this  
141 comparison, with narrowly spread priors ( $\beta \sim$  *Normal*(0,1)), estimates for the effects of  
142 relatedness, SOA, and of the directness x relatedness interaction are smaller (the tight priors,  
143 centered on 0, pull estimates towards them more strongly) but it remains clear that the evidence  
144 shows that the effects are present in the data with the signs (positive or negative) we report  
145 irrespective of likelihood function, or prior choice, among the choices we examined. In  
146 comparison, for effects for which we have relatively weak evidence in this study (the effects of  
147 directness and of SPQDis, OLIFEDis variation, Figure S6), parameter estimates vary markedly  
148 with respect to the width of credibility intervals but not with respect to the point estimates (the  
149 values of the most probable estimates for the coefficients of the effects).

150

151 [Figures S5 and S6 about here]

152 *Figure S5. Variation in relatedness, directness, directness x relatedness, and SOA effects*  
153 *estimates by model variants*

154 *Figure S6. Variation in SPQDis and OLIFEDis effects estimates by model variants*

155

## 156 **Conclusions**

157 We conclude that the estimates derived from our models for the experimental effects of,  
158 especially, relatedness, directness, SOA, and the directness x relatedness interaction are stable  
159 across a range of model variants, fitted with alternate assumptions.

160

161 The full dataset and code for the analyses are available at OSF: <https://osf.io/j29fn/>.

162

## 163 **References**

164 Bates, D., Maechler, M., Bolker, B., et al. (2019). lme4: Linear Mixed-Effects Models using  
165 'Eigen' and S4. R package version 1.1-21. [https://cran.r-](https://cran.r-project.org/web/packages/lme4/lme4.pdf)  
166 [project.org/web/packages/lme4/lme4.pdf](https://cran.r-project.org/web/packages/lme4/lme4.pdf)

167 Depaoli, S., & Van de Schoot, R. (2017). Improving transparency and replication in Bayesian  
168 statistics: The WAMBS-Checklist. *Psychological Methods*, 22, 240-261.

169 Gabry, J. (2017) bayesplot: plotting for Bayesian models. *R Package Version 1.3.0*. Columbia  
170 University, New York. (Available from <http://mc-stan.org/bayesplot/>)

171 Gabry, J., Simpson, D., Vehtari, A., Betancourt, M., & Gelman, A. (2019). Visualization in  
172 Bayesian workflow. *Journal of the Royal Statistical Society: Series A (Statistics in*  
173 *Society)*, 182, 389-402.

174 Gelman, A., & Hennig, C. (2017). Beyond subjective and objective in statistics. *Journal of the*  
175 *Royal Statistical Society: Series A (Statistics in Society)*, 180, 967-1033.

176 Goodman, S. N., Fanelli, D., & Ioannidis, J. P. (2016). What does research reproducibility mean?  
177 *Science Translational Medicine*, 8, 341-347.

178 Matzke, D., & Wagenmakers, E. J. (2009). Psychological interpretation of the ex-Gaussian and  
179 shifted Wald parameters: A diffusion model analysis. *Psychonomic Bulletin & Review*,  
180 16, 798-817.

181 Nicenboim, B., & Vasishth, S. (2016). Statistical methods for linguistic research: Foundational  
182 Ideas—Part II. *Language and Linguistics Compass*, 10, 591-613.

183 Silberzahn, R., Uhlmann, E. L., Martin, D. P., Anselmi, P., Aust, F., Awtrey, E., ... & Carlsson,  
184 R. (2018). Many analysts, one data set: Making transparent how variations in analytic  
185 choices affect results. *Advances in Methods and Practices in Psychological Science*, 1,  
186 337-356.

187 Van Zandt, T. (2000). How to fit a response time distribution. *Psychonomic Bulletin & Review*,  
188 7, 424-465.

189 Vasishth, S., Nicenboim, B., Beckman, M. E., Li, F., & Kong, E. J. (2018). Bayesian data  
190 analysis in the phonetic sciences: A tutorial introduction. *Journal of Phonetics*, 71, 147-  
191 161.
