# Supplementary material for: Semantic priming and schizotypal personality: reassessing the link between thought disorder and enhanced spreading of semantic activation
Source: PeerJ journal article supplement (doi:10.7717/peerj.9511), 2020-07-30

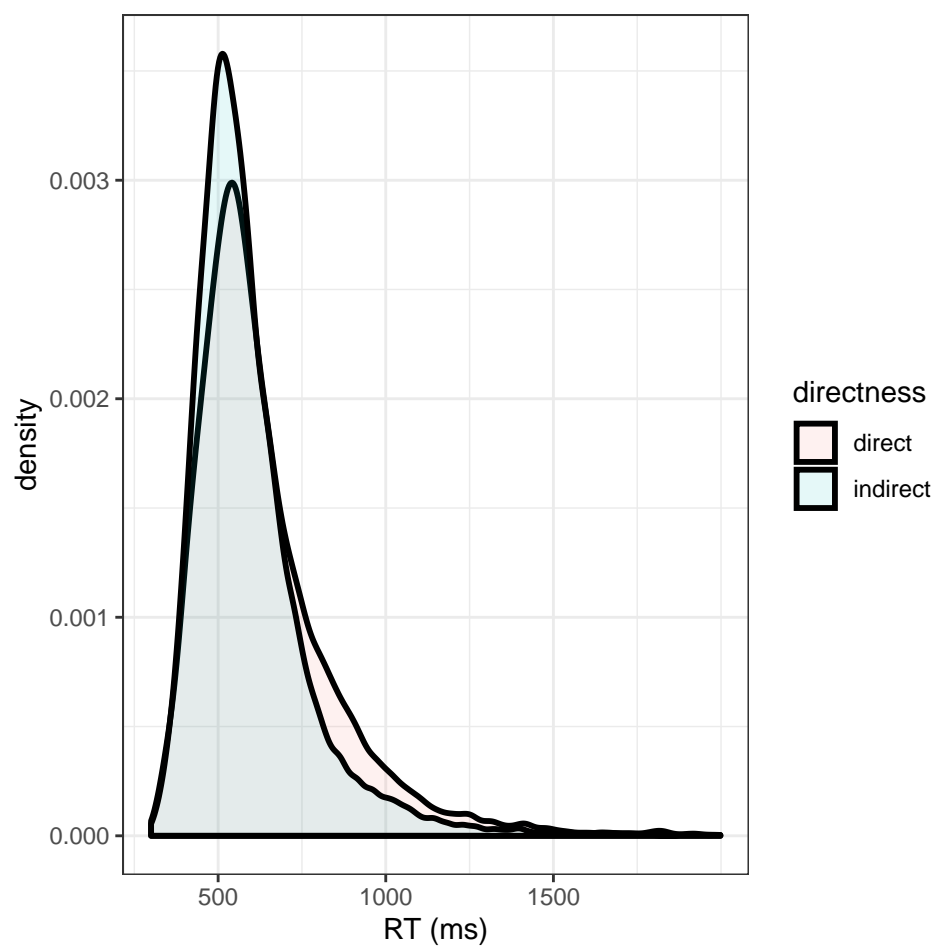

Supplement: Supplemental_Figure_S3._Density_plots_showing_RT_distribution_under_direct_and_indirect_priming_conditions.pdf [file Supplemental_Figure_S3._Density_plots_showing_RT_distribution_under_direct_and_indirect_priming_conditions.pdf]
